# Supplementary material for: l-Fucose increases the fucosylation of colorectal cancer cells via promoting the accumulation of serine
Source: Royal Society of Chemistry journal article supplement (doi:10.1039/d3fo00820g), 2023-01-01
Supplement: d3fo00820g1.pdf [file d3fo00820g1.pdf]

**Table S1.** Summary of RNA-Seq reads data

| Group       | Reads (bp) | Average Reads (bp)       |
|-------------|------------|--------------------------|
|             | 41940544   |                          |
| HCT-116-Con | 42894894   |                          |
|             | 40503994   |                          |
|             | 39947436   |                          |
| HCT-116-Fuc | 39650116   | 40044456.17 ± 1791724.56 |
|             | 41084662   |                          |
|             | 36904668   |                          |
| HT-29-Con   | 37911654   |                          |
|             | 39665026   |                          |
|             | 41471420   |                          |
| HT-29-Fuc   | 40758930   |                          |
|             | 37800130   |                          |

**Table S2.** The top 15 up- and down-regulated genes in control and L-fucose treatment group for HCT-116 cells by RNA-seq analysis.

| Gene                        | Description                                              | Fold change<br>(log <sub>2</sub> ) | p-value  | FDR      |
|-----------------------------|----------------------------------------------------------|------------------------------------|----------|----------|
| <b>UP-REGULATED GENES</b>   |                                                          |                                    |          |          |
| <i>RNU4-23P</i>             | RNA, U4 small nuclear 23, pseudogene                     | 5.40                               | 0.0027   | 0.515    |
| <i>MIR6753</i>              | microRNA 6753                                            | 4.83                               | 0.0072   | 0.665    |
| <i>AL023875.1</i>           | TEC                                                      | 4.69                               | 0.0143   | 0.783    |
| <i>DGCR10</i>               | DiGeorge syndrome critical region gene 10                | 4.52                               | 0.0217   | 0.815    |
| <i>LINC01659</i>            | long intergenic non-protein coding RNA 1659              | 4.52                               | 0.0189   | 0.805    |
| <i>AC091305.1</i>           | TEC                                                      | 4.51                               | 0.0215   | 0.810    |
| <i>AC073439.1</i>           | TEC                                                      | 4.34                               | 0.0339   | 0.879    |
| <i>AL355864.2</i>           | ribosomal protein S2 (RPS2) pseudogene                   | 4.33                               | 0.0334   | 0.879    |
| <i>AC087650.1</i>           | ribosomal protein L29(RPL29) pseudogene                  | 4.32                               | 0.0452   | 0.916    |
| <i>HTRA3</i>                | HtrA serine peptidase 3                                  | 4.26                               | 1.14E-11 | 5.58E-08 |
| <i>SMC5-AS1</i>             | SMC5 antisense RNA 1 (head to head)                      | 3.45                               | 0.0105   | 0.724    |
| <i>RARRES2P4</i>            | retinoic acid receptor responder 2 pseudogene 4          | 3.45                               | 0.0277   | 0.861    |
| <i>CDC27P1</i>              | cell division cycle 27 pseudogene 1                      | 3.37                               | 0.0158   | 0.793    |
| <i>HHATL-AS1</i>            | HHATL antisense RNA 1                                    | 3.35                               | 0.0149   | 0.783    |
| <i>RPL23AP84</i>            | ribosomal protein L23a pseudogene 84                     | 3.34                               | 0.0007   | 0.304    |
| <b>DOWN-REGULATED GENES</b> |                                                          |                                    |          |          |
| <i>KRT18P5</i>              | keratin 18 pseudogene 5                                  | -5.13                              | 0.0025   | 0.492    |
| <i>AP000346.4</i>           | rhabdoid tumor deletion region gene 1 (RTDR1) pseudogene | -5.12                              | 0.0037   | 0.572    |
| <i>AC004039.1</i>           | novel transcript, antisense to KIF3A                     | -4.99                              | 0.0051   | 0.633    |
| <i>AC005274.1</i>           | TEC                                                      | -4.74                              | 0.0096   | 0.716    |
| <i>LINC01635</i>            | long intergenic non-protein coding RNA 1635              | -4.61                              | 0.0148   | 0.783    |
| <i>AP001767.4</i>           | TEC                                                      | -4.61                              | 0.0148   | 0.783    |
| <i>AL157827.2</i>           | Novel transcript, antisense to CENPP                     | -4.61                              | 0.0100   | 0.716    |
| <i>SNORA2C</i>              | small nucleolar RNA, H/ACA box 2C                        | -4.61                              | 0.0156   | 0.788    |
| <i>GULOP</i>                | gulonolactone (L-) oxidase, pseudogene                   | -4.59                              | 0.0264   | 0.856    |
| <i>LMF1-AS1</i>             | LMF1 antisense RNA 1                                     | -4.47                              | 0.0364   | 0.882    |
| <i>YWHAQP7</i>              | YWHAQ pseudogene 7                                       | -4.44                              | 0.0196   | 0.805    |
| <i>THOC7-AS1</i>            | THOC7 antisense RNA 1                                    | -4.28                              | 0.0488   | 0.921    |
| <i>Z98885.1</i>             | suppressor of cytokine signaling 2 (SOCS2) pseudogene    | -4.25                              | 0.0366   | 0.882    |
| <i>STXBP5-AS1</i>           | STXBP5 antisense RNA 1                                   | -3.75                              | 0.0006   | 0.276    |

|                   |                       |       |        |       |
|-------------------|-----------------------|-------|--------|-------|
| <i>DCUN1D2-AS</i> | DCUN1D2 antisense RNA | -3.43 | 0.0201 | 0.805 |
|-------------------|-----------------------|-------|--------|-------|

**Table S3.** The top 15 up- and down-regulated genes in control and L-fucose treatment group for HCT-29 cells by RNA-seq analysis.

| Gene                        | Description                                             | Fold change (log <sub>2</sub> ) | p-value  | FDR   |
|-----------------------------|---------------------------------------------------------|---------------------------------|----------|-------|
| <b>UP-REGULATED GENES</b>   |                                                         |                                 |          |       |
| <i>AKR1C7P</i>              | aldo-keto reductase family 1 member C7, pseudogene      | 5.69                            | 0.0003   | 0.195 |
| <i>AL157813.1</i>           | novel transcript, sense intronic to RCBTB2              | 5.08                            | 0.0024   | 0.403 |
| <i>AC130371.1</i>           | novel transcript, antisense to B3GNTL1                  | 4.88                            | 0.0080   | 0.615 |
| <i>GGTA2P</i>               | glycoprotein, alpha-galactosyltransferase 2, pseudogene | 4.88                            | 0.0080   | 0.615 |
| <i>AP005212.2</i>           | sorting nexin 18 (SNX18) pseudogene                     | 4.87                            | 0.0050   | 0.554 |
| <i>MYO5BP1</i>              | myosin VB pseudogene 1                                  | 4.85                            | 0.0062   | 0.586 |
| <i>AC007613.1</i>           | novel transcript, antisense to TXNDC11                  | 4.85                            | 0.0037   | 0.475 |
| <i>AC007620.3</i>           | novel transcript, antisense to GNB4                     | 4.60                            | 0.0181   | 0.756 |
| <i>AC068338.3</i>           | novel transcript, antisense to NEIL1                    | 4.58                            | 0.0139   | 0.709 |
| <i>AC136443.1</i>           | phospholipase A2, group X (PLA2G10) pseudogene          | 4.44                            | 0.0247   | 0.826 |
| <i>DGCR10</i>               | DiGeorge syndrome critical region gene 10               | 4.43                            | 0.0208   | 0.781 |
| <i>FAM242F</i>              | family with sequence similarity 242 member F            | 4.43                            | 0.0206   | 0.779 |
| <i>DUSP5P1</i>              | dual specificity phosphatase 5 pseudogene 1             | 4.42                            | 0.0235   | 0.814 |
| <i>AP006289.1</i>           | ATP synthase subunit g, mitochondrial (ATP5L)pseudogene | 4.41                            | 0.0195   | 0.770 |
| <i>DUTP6</i>                | deoxyuridine triphosphatase pseudogene 6                | 4.26                            | 0.0454   | 0.912 |
| <b>DOWN-REGULATED GENES</b> |                                                         |                                 |          |       |
| <i>KRT18P55</i>             | keratin 18 pseudogene 55                                | -5.76                           | 6.72E-05 | 0.119 |
| <i>VNIR108P</i>             | vomer nasal 1 receptor 108 pseudogene                   | -4.55                           | 0.0197   | 0.771 |
| <i>DHRX-IT1</i>             | DHRX intronic transcript 1                              | -4.55                           | 0.0170   | 0.743 |
| <i>AC007956.1</i>           | ribosomal protein S2 (RPS2) pseudogene                  | -4.37                           | 0.0424   | 0.907 |
| <i>AL022238.3</i>           | novel transcript, antisense to MKL1                     | -4.36                           | 0.0305   | 0.842 |
| <i>AL139124.1</i>           | novel transcript, antisense to PLCE1                    | -4.36                           | 0.0305   | 0.842 |
| <i>MRPL35P2</i>             | mitochondrial ribosomal protein L35 pseudogene 2        | -4.15                           | 0.0470   | 0.924 |
| <i>AL035071.2</i>           | novel transcript, antisense to MAPRE1                   | -4.01                           | 0.0003   | 0.185 |
| <i>AC022079.2</i>           | novel transcript, antisense to CCDC91                   | -3.59                           | 0.0031   | 0.430 |
| <i>AL161909.1</i>           | ribosomal protein S6 (RPS6) pseudogene                  | -3.40                           | 0.0088   | 0.619 |
| <i>LINC01473</i>            | long intergenic non-protein coding RNA 1473             | -3.39                           | 0.0179   | 0.752 |
| <i>ALGIL8P</i>              | asparagine-linked glycosylation 1-like 8,               | -3.30                           | 0.0146   | 0.710 |

| pseudogene        |                                            |       |        |       |
|-------------------|--------------------------------------------|-------|--------|-------|
| <i>MTND4P9</i>    | MT-ND4 pseudogene 9                        | -3.29 | 0.0080 | 0.615 |
| <i>AL732314.6</i> | novel transcript, antisense to PPP2R3B     | -3.27 | 0.0374 | 0.880 |
| <i>HNRNPA1P3</i>  | heterogeneous nuclear ribonucleoprotein A1 | -3.04 | 0.0296 | 0.838 |
| 3                 | pseudogene 33                              |       |        |       |

**Table S4.** Sequences of primers used in research

| Gene            | Sequences                                                               |
|-----------------|-------------------------------------------------------------------------|
| <i>FUT2</i>     | F: 5' -CTACCACCTGAACGACTGGATG-3'<br>R: 5' -AGGGTGAACCTCCTGGAGGATCT-3'   |
| <i>FUT8</i>     | F: 5' -GACAGAACTGGTTCAGCGGAGA-3'<br>R: 5' -GCAGTAGACCACATGATGGAGC-3'    |
| <i>FUK</i>      | F: 5' -GCTCAATGACCACCTGCTCTTG-3'<br>R: 5' -TCAGTTTGCCGTACCAGGCTGT-3'    |
| <i>FPGT</i>     | F: 5' - CAGATTGGGGCCTGATGTTTC -3'<br>R: 5' - TCAAGTTGTCTTGCACTCCAAA -3' |
| <i>PSPH</i>     | F: 5' -GACAGCACGGTCATCAGAGAAG-3'<br>R: 5' -CGCTCTGTGAGAGCAGCTTTGA-3'    |
| <i>GCAT</i>     | F: 5' -TCTATGGCTGCCAAGACCCAGA-3'<br>R: 5' -CTCTCTTCAGCATGTCATCCGC-3'    |
| <i>SERPINE1</i> | F: 5' -CTCATCAGCCACTGGAAAGGCA-3'<br>R: 5' -GACTCGTGAAGTCAGCCTGAAAC-3'   |
| <i>PSAT1</i>    | F: 5' -ACTTCCTGTCCAAGCCAGTGGA-3'<br>R: 5' -CTGCACCTTGTATTCCAGGACC-3'    |
| <i>GAPDH</i>    | F: 5' -GTCAAGGCTGAGAACGGGAA- 3'<br>R: 5' -AAATGAGCCCCAGCCTTCTC - 3'     |

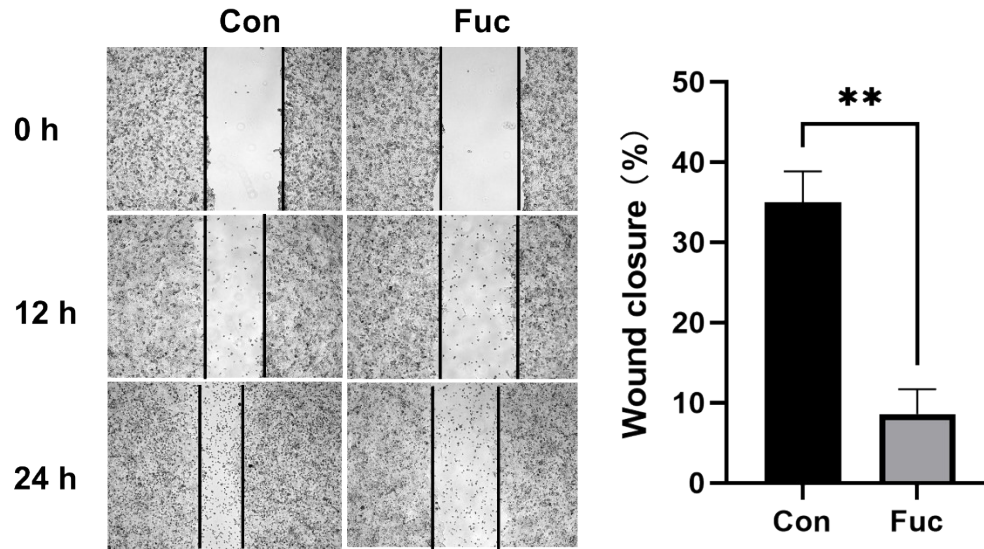

**Figure S1** Cell migration of HCT-116 cells with supplemental L-fucose determined by the wound healing assays.

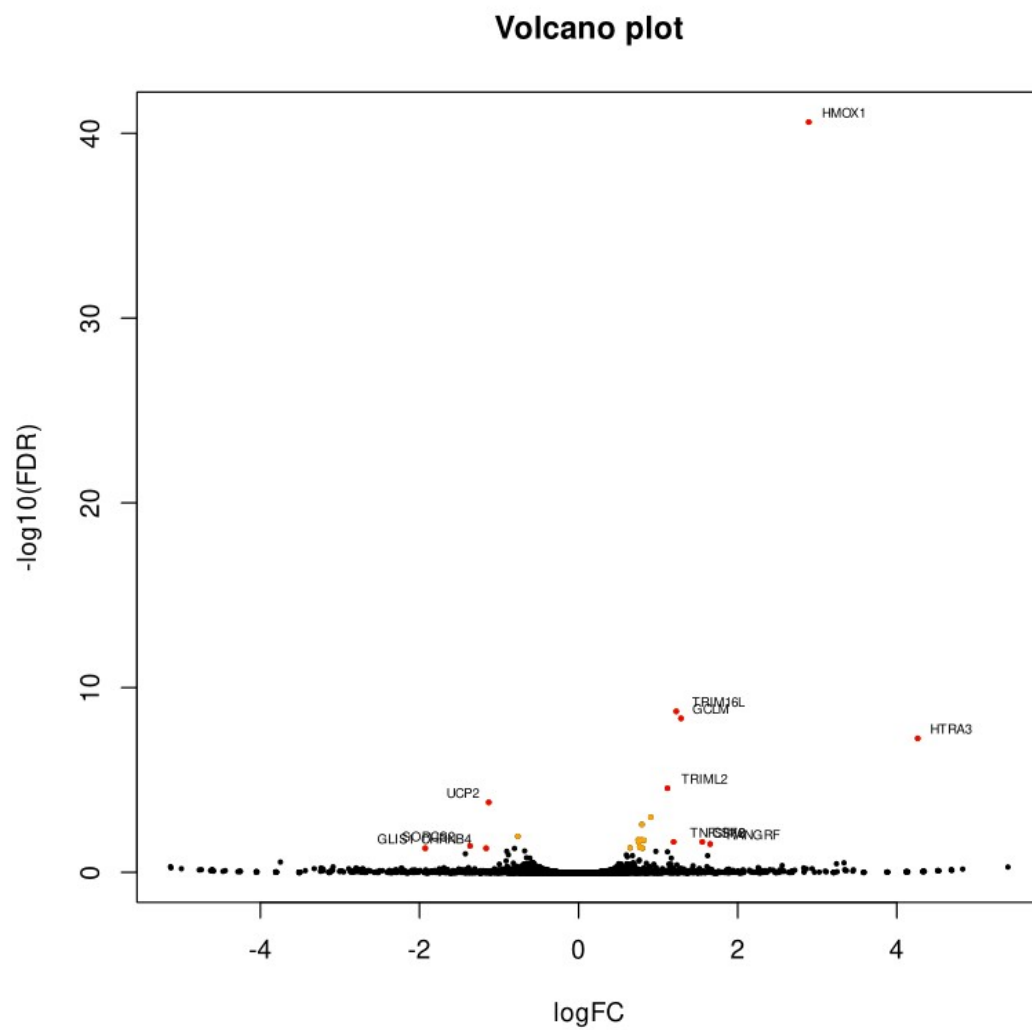

**Figure S2** Volcano plot shows ( $\log_2$ ) fold change in gene expression of HCT-116 cells treated with L-fucose compared with untreated control, plotted against significance ( $-\log_{10}[\text{FDR value}]$ ).

Significant genes ( $P < 0.05$ ) are represented in red.

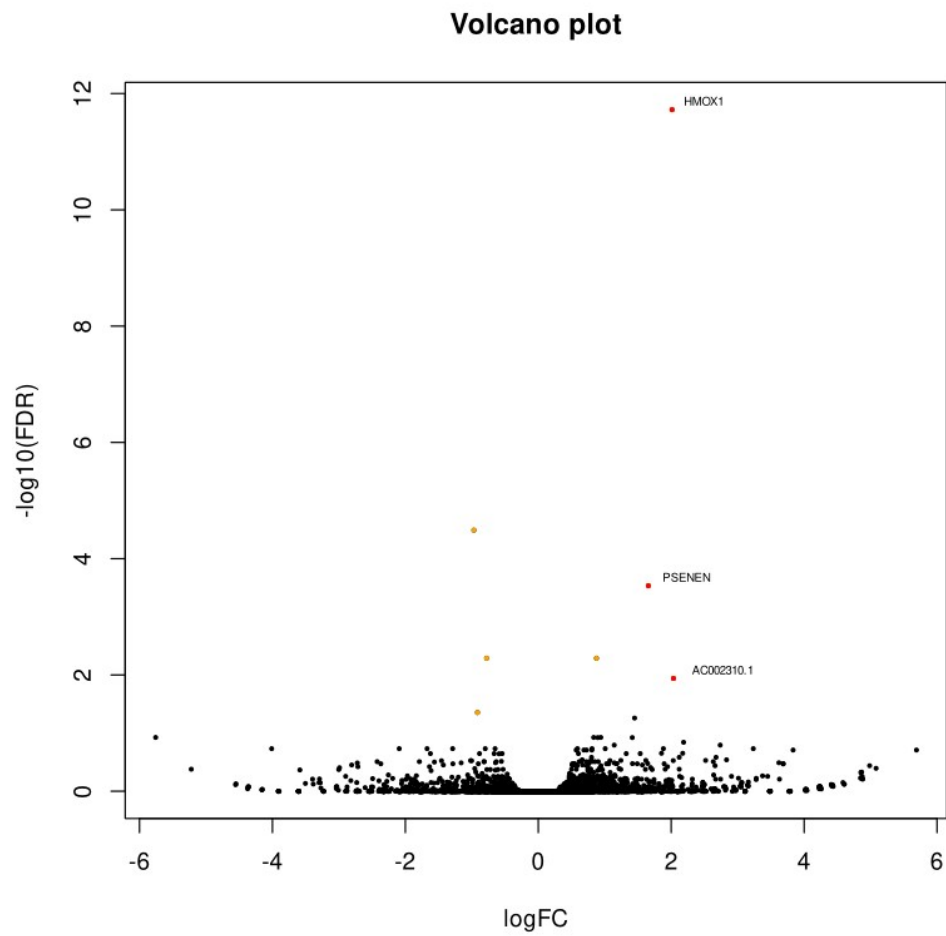

**Figure S3** Volcano plot shows ( $\log_2$ ) fold change in gene expression of HT-29 cells treated with L-fucose compared with untreated control, plotted against significance ( $-\log_{10}[\text{FDR value}]$ ). Significant genes ( $P < 0.05$ ) are represented in red.

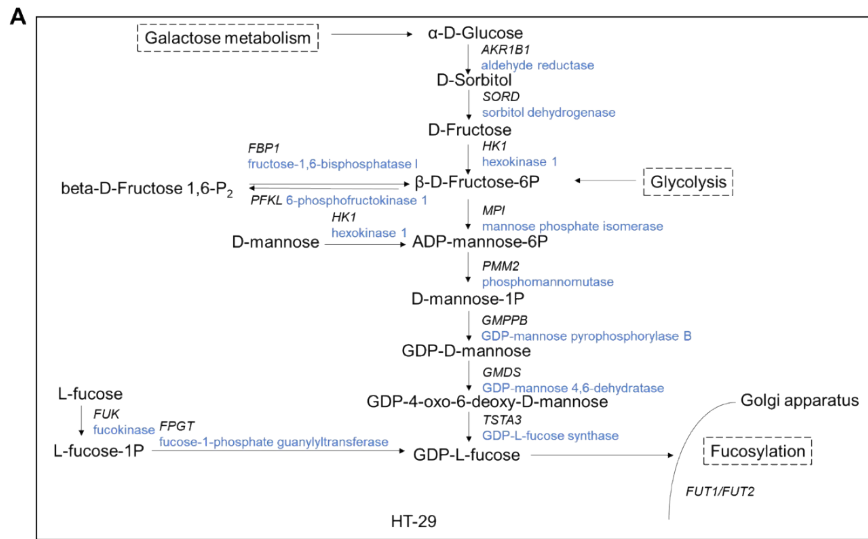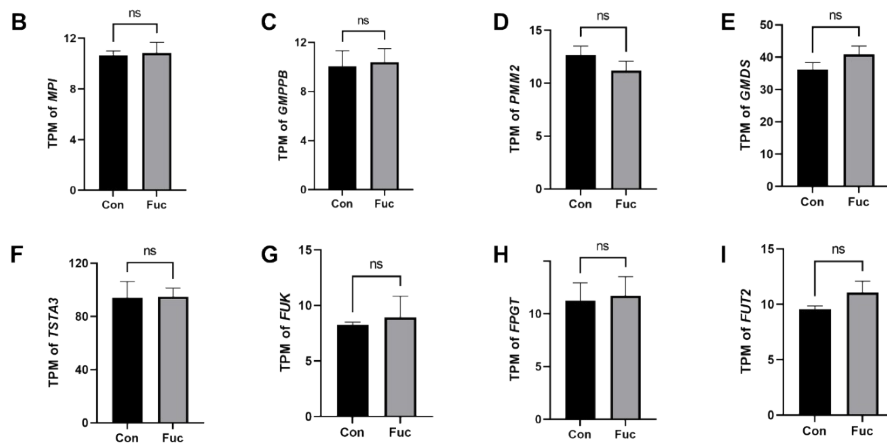

**Figure S4 A**, Genes involved in the exogenous fucose metabolic pathway of HT-29 cells. **B**, fold change of mRNA expression for the genes encoding key enzymes in exogenous and endogenous fucose metabolic pathways in HT-29 cells. n = 3 samples/group.

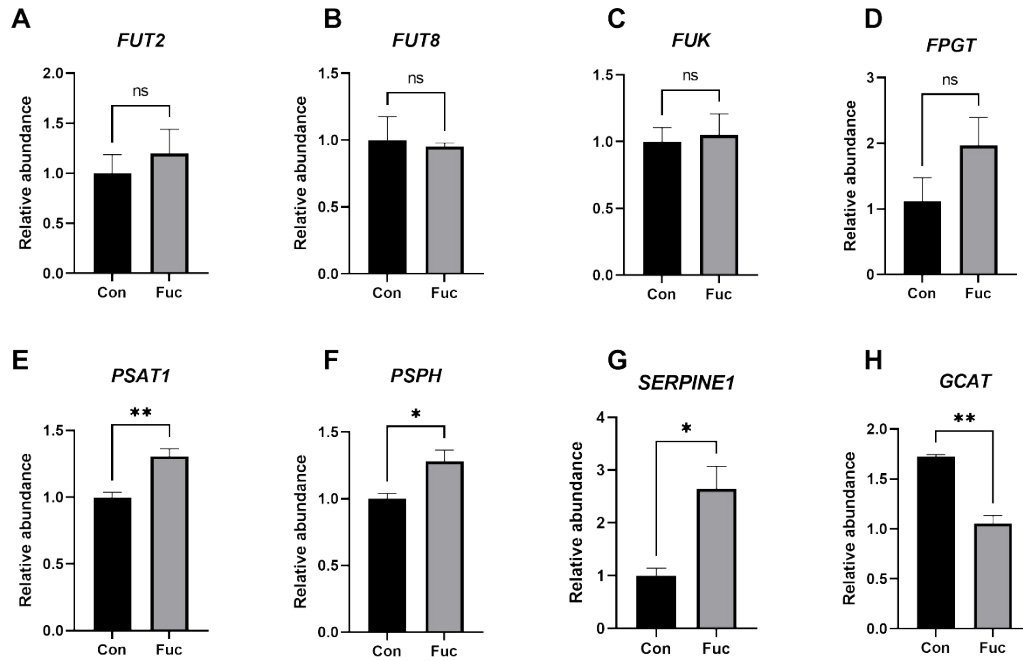

**Figure S5** Quantitative real-time PCR assays of genes in HCT-116 cells identified by RNA-seq. The mRNA levels of genes were normalized to GAPDH. Relative mRNA levels of genes in L-fucose group were compared to the control group, where the expression was set to 1.0 ( $n = 3$ ; values represent mean  $\pm$  SEM). An unpaired Student's t-test was used to assess statistically significant differences (compared to control \* $P < 0.05$ ; \*\* $P < 0.01$ ; ns, no significance).
